# Supplementary material for: Fully Automatic System for Accurate Localisation and Analysis of Cephalometric Landmarks in Lateral Cephalograms
Source: PubMed Central journal article supplement (PMC5028843; doi:10.1038/srep33581), 2016-09-20
Supplement: srep33581-s1.pdf [file srep33581-s1.pdf]

# Fully Automatic System for Accurate Localisation and Analysis of Cephalometric Landmarks in Lateral Cephalograms

Claudia Lindner, Ching-Wei Wang, Cheng-Ta Huang, Chung-Hsing Li, Sheng-Wei Chang, Tim F. Cootes

## **SUPPLEMENTARY MATERIAL**

**Table S1**

Quantitative comparison of the average point-to-point errors (in pixels, 1 pixel = 0.1mm) for all methods submitted to the ISBI 2014 and ISBI 2015 Grand Challenges on automated cephalometric landmark detection. All methods were tested on the same dataset of 100 cephalograms. Results also include the statistics of a paired sample T-test conducted in SPSS between the best achieving method (7) and each of the other methods demonstrating that (7) is significantly better ( $p < 0.0001$ ). Results reproduced under CC BY 4.0 licence from

<http://dx.doi.org/10.1016/j.media.2016.02.004>.

| Method                       | N           | Mean                  | Std. deviation | Std. error             |
|------------------------------|-------------|-----------------------|----------------|------------------------|
| Chen (1)                     | 100         | 28.4722               | 7.69665        | 0.76966                |
| Chu (2)                      | 100         | 26.7896               | 7.39018        | 0.73902                |
| Ibragimov (3)                | 100         | 19.191                | 6.18062        | 0.61806                |
| Mirzaalian (4)               | 100         | 23.5309               | 8.4784         | 0.84784                |
| Vandaele (5)                 | 100         | 21.9842               | 9.11095        | 0.9111                 |
| Ibragimov (6)                | 100         | 18.507                | 6.35577        | 0.63558                |
| Lindner (7)                  | 100         | 16.5614               | 5.39071        | 0.53907                |
| <i>Paired sample T-test</i>  | <i>Mean</i> | <i>Std. deviation</i> | <i>t</i>       | <i>Sig. (2-tailed)</i> |
| Chen (1) – Lindner (7)       | 11.91       | 5.63                  | 21.138         | <0.0001                |
| Chu (2) – Lindner (7)        | 10.23       | 5.59                  | 18.313         | <0.0001                |
| Ibragimov (3) – Lindner (7)  | 2.63        | 4.56                  | 5.769          | <0.0001                |
| Mirzaalian (4) – Lindner (7) | 6.97        | 6.96                  | 10.017         | <0.0001                |
| Vandaele (5) – Lindner (7)   | 5.42        | 7.21                  | 7.519          | <0.0001                |
| Ibragimov (6) – Lindner (7)  | 1.95        | 4.66                  | 4.173          | <0.0001                |

#### References:

1. Chen, C., Wang, C.W., Huang, C.T., Li, C.H., and Zheng, G. *Fully-Automatic Landmark detection in Skull X-Ray images*. Automatic Cephalometric X-Ray Landmark Detection Challenge (ISBI 2014). <http://www-o.ntust.edu.tw/~cweiwang/celph/paper/chen.pdf>
2. Chu, C., Chen, C., Wang, C.W., Huang, C.T., Li, C.H., Nolte, L.P., and Zheng, G. *Fully automatic cephalometric x-ray landmark detection using random forest regression and sparse shape composition*. Automatic Cephalometric X-Ray Landmark Detection Challenge (ISBI 2014). <http://www-o.ntust.edu.tw/~cweiwang/celph/paper/chu.pdf>
3. Ibragimov, B., Likar, B., Pernus, F., and Vrtovec, T. *Automatic cephalometric X-ray landmark detection by applying game theory and random forests*. Automatic Cephalometric X-Ray Landmark Detection Challenge (ISBI 2014). <http://www-o.ntust.edu.tw/~cweiwang/celph/paper/bulat.pdf>
4. Mirzaalian, H. and Hamarneh, G. *Automatic globally-optimal pictorial structures with random decision forest based likelihoods for cephalometric x-ray landmark detection*. Automatic Cephalometric X-Ray Landmark Detection Challenge (ISBI 2014). <http://www-o.ntust.edu.tw/~cweiwang/celph/paper/mirzaalian.pdf>
5. Vandaele, R., Maree, R., Jodogne, S., and Geurts, P. *Automatic cephalometric x-ray landmark detection challenge 2014: A tree-based approach*. Automatic Cephalometric X-Ray Landmark Detection Challenge (ISBI 2014). <http://www-o.ntust.edu.tw/~cweiwang/celph/paper/vandaele.pdf>
6. Ibragimov, B., Likar, B., Pernus, F. and Vrtovec, T. *Computerized Cephalometry by Game Theory with Shape- and Appearance-Based Landmark Refinement*. Grand Challenges in Dental X-ray Image Analysis – Automated Detection and Analysis for Diagnosis in Cephalometric X-ray Image (ISBI 2015). [http://www-o.ntust.edu.tw/~cweiwang/ISBI2015/challenge1/isbi2015\\_ibragimov.pdf](http://www-o.ntust.edu.tw/~cweiwang/ISBI2015/challenge1/isbi2015_ibragimov.pdf)
7. Lindner, C. and Cootes, T. *Fully Automatic Cephalometric Evaluation using Random Forest Regression-Voting*. Grand Challenges in Dental X-ray Image Analysis – Automated Detection and Analysis for Diagnosis in Cephalometric X-ray Image (ISBI 2015). [http://www-o.ntust.edu.tw/~cweiwang/ISBI2015/challenge1/isbi2015\\_Lindner-Cootes.pdf](http://www-o.ntust.edu.tw/~cweiwang/ISBI2015/challenge1/isbi2015_Lindner-Cootes.pdf)

**Table S2**

Cephalometric landmarks and their description.

| <b>ID</b> | <b>Landmark name</b>          | <b>Landmark description</b>                                                                                                                                                                       |
|-----------|-------------------------------|---------------------------------------------------------------------------------------------------------------------------------------------------------------------------------------------------|
| L1        | Sella                         | The geometric centre of the pituitary fossa (sella turcica), determined by inspection of a constructed point in the midsagittal plane.                                                            |
| L2        | Nasion                        | The intersection of the internasal and frontonasal sutures, in the midsagittal plane.                                                                                                             |
| L3        | Orbitale                      | A point midway between the lowest points on the inferior margin of the two orbits (eye sockets).                                                                                                  |
| L4        | Porion                        | The central point on the upper margin of the external auditory meatus.                                                                                                                            |
| L5        | Subspinale<br>(A-point)       | The deepest (most posterior) midline point on the curvature between the ANS and prosthion.                                                                                                        |
| L6        | Supramentale<br>(B-point)     | The deepest (most posterior) midline point on the bony curvature of the anterior mandible, between infradentale and pogonion.                                                                     |
| L7        | Pogonion                      | The most anterior point on the contour of the bony chin.                                                                                                                                          |
| L8        | Menton                        | The most inferior point of the mandibular symphysis.                                                                                                                                              |
| L9        | Gnathion                      | The most anterior inferior point on the bony chin.                                                                                                                                                |
| L10       | Gonion                        | The most posterior inferior point on the outline of the angle of the mandible.                                                                                                                    |
| L11       | Incision inferius             | The incisal tip of the most labially placed mandibular incisor.                                                                                                                                   |
| L12       | Incision superius             | The incisal tip of the most labially placed maxillary central incisor.                                                                                                                            |
| L13       | Upper lip                     | Labrale superior (Ls) The point denoting the vermilion border of the upper lip, in the midsagittal plane.                                                                                         |
| L14       | Lower lip                     | Labrale inferior (Li) The point denoting the vermilion border of the lower lip, in the midsagittal plane.                                                                                         |
| L15       | Subnasale                     | The point where the base of the columella of the nose meets the upper lip.                                                                                                                        |
| L16       | Soft tissue<br>pogonion       | The most prominent point on the soft tissue contour of the chin.                                                                                                                                  |
| L17       | Posterior nasal<br>spine      | The most posterior point on the bony hard palate (nasal floor).                                                                                                                                   |
| L18       | Anterior nasal<br>spine (ANS) | The tip of the bony anterior nasal spine at the inferior margin of the piriform aperture.                                                                                                         |
| L19       | Articulare                    | A constructed point representing the intersection of three radiographic images: the inferior surface of the cranial base and the posterior outlines of the ascending rami or mandibular condyles. |

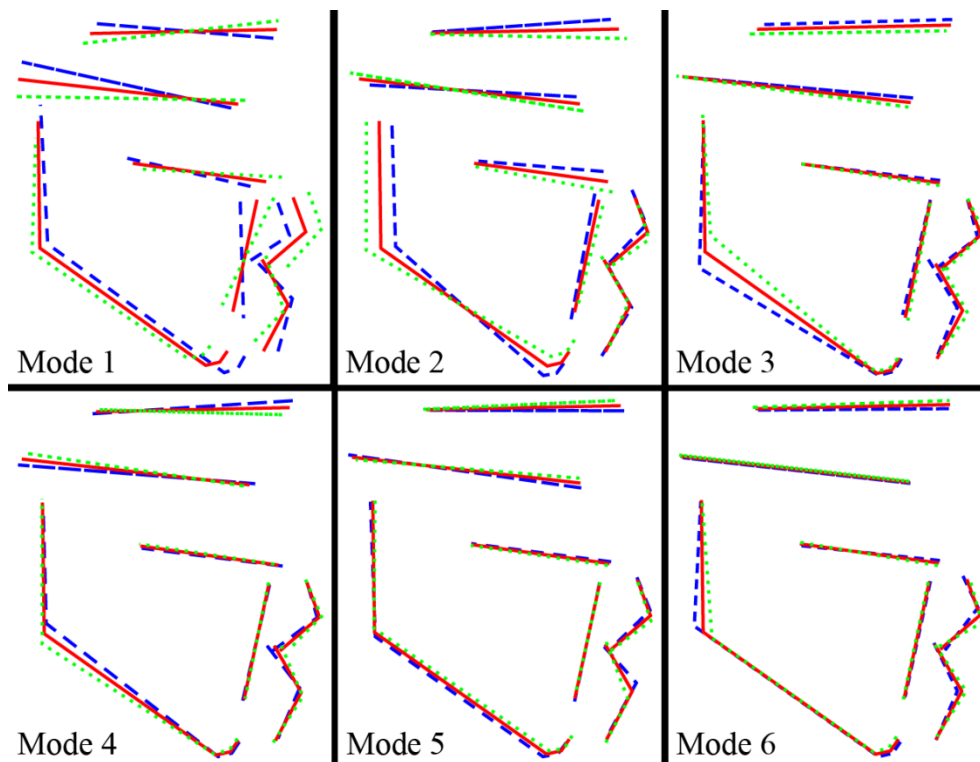

**Figure S3:** Shape variation exhibited by the first six modes of a statistical shape model (Ref. 26, DOI: <http://dx.doi.org/10.1006/cviu.1995.1004>) built from the doctor2 ground truth annotations of all 400 images, explaining 75% of the overall shape variation. Each figure shows the average (—) and  $\pm 2.0$  standard deviations. For easier visualisation of differences, the landmarks were connected as follows: [1-2], [3-4], [5-6], [7-9-8-10-19], [11-14-16], [12-13-15] and [17-18].

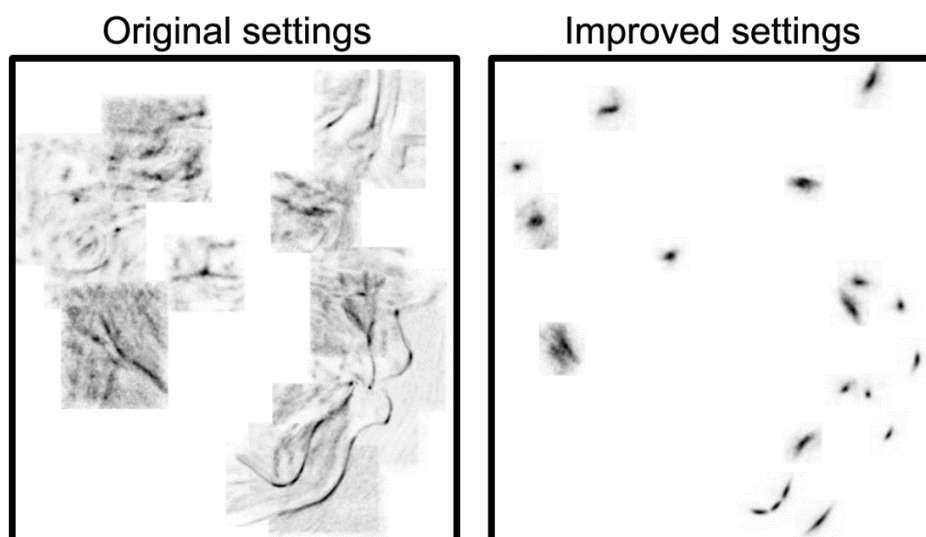

**Figure S4:** The output of the 19 individual RF landmark predictors on an example test image represented as superposed voting response patches: for (left) the original parameter settings (Ref. 22, DOI: <http://dx.doi.org/10.1109/TMI.2013.2258030>); and (right) the proposed improved parameter settings. The darker a location is the more likely is the landmark position.

**Table S5**

Confusion matrices of the automatic doctor1 (i.e. automatically identified landmark positions by FALA system) vs the doctor1 ground truth (i.e. manually placed landmark positions) classifications for eight clinical measurements to diagnose skeletal malformations in 400 subjects. Diagonals give successful classification rates (SCR).

| ANB                      |    | Automatic calculation |       |       |
|--------------------------|----|-----------------------|-------|-------|
|                          |    | C1                    | C2    | C3    |
| Manual ground truth      | C1 | 59.2%                 | 12.6% | 28.2% |
|                          | C2 | <b>37.9%</b>          | 57.5% | 4.6%  |
|                          | C3 | 8.1%                  | 1.0%  | 91.0% |
| <b>Diagonal average:</b> |    | <b>69.21%</b>         |       |       |

| SNB                      |    | Automatic calculation |       |       |
|--------------------------|----|-----------------------|-------|-------|
|                          |    | C1                    | C2    | C3    |
| Manual ground truth      | C1 | 75.8%                 | 8.4%  | 15.8% |
|                          | C2 | 20.9%                 | 79.1% | 0.0%  |
|                          | C3 | 8.0%                  | 1.2%  | 90.8% |
| <b>Diagonal average:</b> |    | <b>81.90%</b>         |       |       |

| SNA                      |    | Automatic calculation |       |       |
|--------------------------|----|-----------------------|-------|-------|
|                          |    | C1                    | C2    | C3    |
| Manual ground truth      | C1 | 70.4%                 | 15.5% | 14.1% |
|                          | C2 | 25.4%                 | 72.0% | 2.7%  |
|                          | C3 | <b>31.9%</b>          | 0.0%  | 68.1% |
| <b>Diagonal average:</b> |    | <b>70.17%</b>         |       |       |

| ODI                      |    | Automatic calculation |       |       |
|--------------------------|----|-----------------------|-------|-------|
|                          |    | C1                    | C2    | C3    |
| Manual ground truth      | C1 | 75.8%                 | 8.6%  | 15.6% |
|                          | C2 | <b>36.0%</b>          | 62.0% | 2.0%  |
|                          | C3 | 16.5%                 | 0.0%  | 83.5% |
| <b>Diagonal average:</b> |    | <b>73.78%</b>         |       |       |

| APDI                     |    | Automatic calculation |       |       |
|--------------------------|----|-----------------------|-------|-------|
|                          |    | C1                    | C2    | C3    |
| Manual ground truth      | C1 | 75.8%                 | 12.1% | 12.1% |
|                          | C2 | 18.0%                 | 78.7% | 3.4%  |
|                          | C3 | 11.2%                 | 0.0%  | 88.8% |
| <b>Diagonal average:</b> |    | <b>81.08%</b>         |       |       |

| FHI                      |    | Automatic calculation |       |       |
|--------------------------|----|-----------------------|-------|-------|
|                          |    | C1                    | C2    | C3    |
| Manual ground truth      | C1 | 81.6%                 | 2.0%  | 16.4% |
|                          | C2 | <b>60.0%</b>          | 40.0% | 0.0%  |
|                          | C3 | 12.7%                 | 0.0%  | 87.3% |
| <b>Diagonal average:</b> |    | <b>69.63%</b>         |       |       |

| FMA                      |    | Automatic calculation |       |       |
|--------------------------|----|-----------------------|-------|-------|
|                          |    | C1                    | C2    | C3    |
| Manual ground truth      | C1 | 66.4%                 | 23.1% | 10.6% |
|                          | C2 | 11.4%                 | 86.9% | 1.7%  |
|                          | C3 | 13.6%                 | 0.0%  | 86.4% |
| <b>Diagonal average:</b> |    | <b>79.90%</b>         |       |       |

| MW                       |    | Automatic calculation |       |       |       |
|--------------------------|----|-----------------------|-------|-------|-------|
|                          |    | C1                    | C3    | C4    | C5    |
| Manual ground truth      | C1 | 82.7%                 | 0.7%  | 8.6%  | 7.9%  |
|                          | C3 | 4.7%                  | 89.5% | 0.0%  | 5.8%  |
|                          | C4 | 18.8%                 | 0.9%  | 78.6% | 1.7%  |
|                          | C5 | 26.9%                 | 9.0%  | 0.0%  | 64.2% |
| <b>Diagonal average:</b> |    | <b>80.40%</b>         |       |       |       |

|                                                                    |  |                      |
|--------------------------------------------------------------------|--|----------------------|
| <b>Average SCR over all measurements (i.e. diagonal averages):</b> |  | <b>75.8±1.98% SE</b> |
|--------------------------------------------------------------------|--|----------------------|

|                                                                                             |  |                              |
|---------------------------------------------------------------------------------------------|--|------------------------------|
| <b>Average accuracy over all measurements (based on all correctly classified subjects):</b> |  | <b>2552/3200 -&gt; 79.8%</b> |
|---------------------------------------------------------------------------------------------|--|------------------------------|
